# Supplementary material
Source: MDPI journal article supplement (https://www.mdpi.com/1424-2818/14/11/986)
Supplement: s1 [file s1]

**Table S2**

Plant diversity, abundance and evenness between mine sites and reference sites across all seasons (H is Shannon's Diversity Index, D is Simpson's Diversity Index, R is Margalef Index, and E is Evenness index). The sampling at LWS was conducted only during spring 2022 when the GTS site pair was inaccessible. Indices were calculated from three quadrats.

| Season      | Location | Site      | H     | D     | R     | E     |
|-------------|----------|-----------|-------|-------|-------|-------|
| Spring 2021 | XLS      | Mine      | 1.550 | 0.651 | 6.263 | 0.463 |
|             |          | Reference | 1.564 | 0.657 | 5.670 | 0.475 |
|             | MJS      | Mine      | 1.574 | 0.662 | 6.582 | 0.440 |
|             |          | Reference | 1.581 | 0.665 | 6.719 | 0.547 |
|             | GTS      | Mine      | 1.576 | 0.660 | 7.692 | 0.278 |
|             |          | Reference | 1.578 | 0.663 | 6.954 | 0.448 |
| Autumn 2021 | XLS      | Mine site | 1.584 | 0.666 | 6.063 | 0.415 |
|             |          | Reference | 1.584 | 0.666 | 5.898 | 0.341 |
|             | MJS      | Mine      | 1.570 | 0.660 | 4.293 | 0.118 |
|             |          | Reference | 1.537 | 0.645 | 6.373 | 0.395 |
|             | GTS      | Mine      | 1.546 | 0.652 | 4.386 | 0.192 |
|             |          | Reference | 1.566 | 0.658 | 4.368 | 0.408 |
| Spring 2021 | MJS      | Mine      | 1.557 | 0.653 | 3.881 | 0.318 |
|             |          | Reference | 1.582 | 0.665 | 4.899 | 0.588 |
|             | XLS      | Mine      | 1.580 | 0.664 | 5.602 | 0.615 |
|             |          | Reference | 1.579 | 0.664 | 4.971 | 0.486 |
|             | LWS      | Mine      | 1.583 | 0.666 | 3.977 | 0.613 |
|             |          | Reference | 1.579 | 0.664 | 4.029 | 0.537 |
