# Supplementary material
Source: MDPI journal article supplement (https://www.mdpi.com/1424-2818/14/11/986)
Supplement: s1 [file s1 › Supplementary Table S1.xlsx]

## Sheet: Sheet1
Table S1 Main plant species and characteristics in XLS, MJS, GTS, LWS areas（Superscript 1 refers to the mine site of the location, and superscript 2 refers to the reference or spoils site of the location）
Family	Species	Chinese name	Invasive/Native	Growth form	Sites present	XLS mine	XLS spoils	MJS mine	MJS reference	LWS mine	LWS spoils	GTS mine	GTS reference
Acanthaceae	Rostellularia procumbens	爵床	I	Annual	MJS2	0	0	0	10	0	0	0	0
Amaranthaceae	Chenopodium album	藜	I	Annual	XLS1	0	0	0	0	0	0	0	0
Amaryllidaceae	Allium sativum	蒜	N	Perennial	XLS1	22	0	0	0	0	0	0	0
Apocynaceae	Trachelospermum jasminoides	络石	N	Perennial woody vine	XLS2	0	187	0	0	0	0	0	0
Asclepiadaceae	Metaplexis japonica	萝藦	I	Perennial herbaceous vine	MJS1，2、GTS1，2	0	0	3	1	0	0	1	3
Asparagaceae	Anemarrhena asphodeloides	知母	I	Perennial	MJS1	0	0	40	0	0	0	0	0
	Ophiopogon bodinieri	沿阶草	I	Perennial	XLS1	30	0	0	0	0	0	0	0
	Ophiopogon japonicus	麦冬	N	Perennial	MJS2	0	0	0	151	0	0	0	0
Asteraceae	Ageratum conyzoides	藿香蓟	N	Annual	MJS2	0	0	0	59	0	0	0	0
	Artemisia argyi	艾	N	Perennial	XLS1，2、MJS1、GTS1，2	247	57	553	0	0	0	194	19
	Artemisia carvifolia	青蒿	I	Annual	MJS1，2	0	0	9	5	0	0	0	0
	Artemisia indica	五月艾	N	Perennial	XLS1、MJS2	82	0	0	0	0	0	0	0
	Artemisia selengensis	蒌蒿	N	Perennial	XLS2	0	13	0	0	0	0	0	0
	Aster subulatus	钻叶紫菀	I	Annual	XLS1、MJS2、GTS1，2	31	0	0	1	0	0	9	8
	Aster tataricus	紫菀	I	Perennial	GTS1	0	0	0	0	0	0	9	0
	Bidens biternata	金盏银盘	I	Annual	GTS1	0	0	0	0	0	0	9	0
	Bidens pilosa	鬼针草	I	Annual	XLS1，2、MJS2	10	16	0	5	0	0	0	0
	Bidens tripartita	狼杷草	I	Annual	GTS1	0	0	0	0	0	0	1	0
	Carduus nutans	飞廉	I	Biennial or perennial	MJS2	0	0	0	61	0	0	0	0
	Chrysanthemum indicum	野菊	N	Perennial	XLS1，2、MJS1、GTS1，2	77	16	67	0	0	0	18	7
	Cirsium arvense	刺儿菜	I	Perennial	MJS2、GTS1	0	0	0	14	0	0	18	0
	Conyza bonariensis	香丝草	I	Annual or biennial	XLS1	9	0	0	0	0	0	0	0
	Crepidiastrum sonchifolium	尖裂假还阳参	N	Annual or biennial	MJS1、GTS1	0	0	11	0	0	0	19	0
	Elephantopus scaber	地胆草	I	Perennial	MJS2	0	0	0	1	0	0	0	0
	Erigeron acer	飞蓬	I	Annual or perennial	MJS1，2、GTS1	0	0	6	65	0	0	79	0
	Erigeron annuus	一年蓬	I	Annual or biennial	XLS1，2、MJS1	15	81	25	0	0	0	0	0
	Erigeron canadensis	小蓬草	I	Annual	XLS1、MJS2、GTS1，2	116	0	0	32	0	0	119	174
	Gnaphalium affine	鼠曲草	N	Annual	MJS2、GTS2	0	0	0	1	0	0	0	31
	Hemistepta lyrata	泥胡菜	I	Annual	XLS1，2、MJS2、GTS1，2、LWS1	5	20	0	4	36	0	2	8
	Kalimeris indica	马兰	N	Perennial	XLS2、MJS2、GTS1	0	3	0	13	0	0	1	0
	Lactuca indica	翅果菊	N	Annual or biennial	XLS1、MJS2、GTS1，2、LWS1，2	13	0	0	3	12	6	11	11
	Picris hieracioides	毛连菜	I	Biennial	GTS1	0	0	0	0	0	0	2	0
	Picris japonica	日本毛连菜	I	Perennial	GTS1	0	0	0	0	0	0	40	0
	Pterocypsela laciniata	多裂翅果菊	N	Perennial	GTS2	0	0	0	0	0	0	0	2
	Senecio scandens	千里光	I	Perennial	XLS1	27	0	0	0	0	0	0	0
	Solidago canadensis	加拿大一枝黄花	I	Perennial	XLS1，2、MJS1，2、GTS1，2、LWS1，2	231	659	12	147	278	105	0	8
	Sonchus oleraceus	苦苣菜	I	Annual or biennial	XLS1、LWS1，2	4	0	0	0	23	20	0	0
	Sonchus wightianus	苣荬菜	I	Perennial	XLS1、GTS1，2	60	0	0	0	0	0	40	1
	Taraxacum mongolicum	蒲公英	I	Perennial	XLS1、MJS1、GTS1	149	0	14	0	0	0	1	0
	Xanthium sibiricum	苍耳	N	Annual	XLS2、MJS1	0	1	10	0	0	0	0	0
	Youngia japonica	黄鹌菜	N	Annual or biennial	XLS1，2、GTS2、LWS1	96	11	0	0	6	0	0	19
Brassicaceae	Capsella bursa-pastoris	荠菜	N	Annual or biennial	XLS2、MJS2、GTS2、LWS2	0	23	0	14	0	46	0	71
	Cardamine hirsuta	碎米荠	I	Annual	XLS1	71	0	0	0	0	0	0	0
	Lepidium apetalum	独行菜	I	Annual or biennial	XLS2	0	17	0	0	0	0	0	0
	Rorippa indica	蔊菜	I	Annual or biennial	MJS2、GTS1	0	0	0	6	0	0	3	0
	Thlaspi arvense	菥蓂	I	Annual	XLS1	1	0	0	0	0	0	0	0
Cannabaceae	Celtis sinensis	朴树	N	Trees	XLS1、MJS2	2	0	0	10	0	0	0	0
	Humulus scandens	葎草	N	Perennial	XLS1，2、GTS1，2、LWS1，2	2	24	0	0	51	267	6	138
Caryophyllaceae	Arenaria serpyllifolia	无心菜	I	Annual or biennial	XLS2、MJS1，2、GTS1	0	210	120	353	0	0	23	0
	Cerastium glomeratum	球序卷耳	I	Annual	XLS2、MJS2、GTS1，2、LWS1，2	0	249	0	150	26	22	7	161
	Stellaria media	繁缕	I	Annual or biennial	XLS1	24	0	0	0	0	0	0	0
Celastraceae	Euonymus fortunei	扶芳藤	N	Shrubs	GTS2	0	0	0	0	0	0	0	30
Chenopodiaceae	Dysphania ambrosioides	土荆芥	I	Annual or perennial	MJS2	0	0	0	38	0	0	0	0
Commelinaceae	Commelina communis	鸭跖草	N	Annual	GTS2	0	0	0	0	0	0	0	15
Convolvulaceae	Calystegia pellita	藤长苗	N	Perennial	GTS1	0	0	0	0	0	0	14	0
Cornaceae	Alangium chinense	八角枫	N	Shrubs or trees	XLS1	3	0	0	0	0	0	0	0
	Swida walteri	毛梾	N	Trees	XLS1	13	0	0	0	0	0	0	0
Crassulaceae	Phedimus aizoon	费菜	N	Perennial	XLS2	0	13	0	0	0	0	0	0
Cucurbitaceae	Trichosanthes kirilowii	栝楼	I	Perennial	XLS1、MJS1	4	0	1	0	0	0	0	0
Cyperaceae	Carex spp.	薹草	N	Perennial	MJS1	0	0	300	0	0	0	0	0
	Fimbristylis miliaceae	水虱草	N	Annual	GTS	0	0	0	0	0	0	0	15
Equisetaceae	Equisetum arvense	问荆	I	Perennial	GTS2	0	0	0	0	0	0	0	121
Euphorbiaceae	Acalypha australis	铁苋菜	N	Annual	XLS2、MJS1	0	33	38	0	0	0	0	0
	Euphorbia helioscopia	泽漆	I	Annual	XLS1，2、MJS1，2、GTS1，2、LWS1，2	22	149	33	281	89	132	92	45
	Euphorbia humifusa	地锦草	I	Annual	MJS1、GTS1，2	0	0	3	0	0	0	1	40
Geraniaceae	Geranium wilfordii	老鹳草	I	Perennial	XLS1，2、MJS1，2、GTS2、LWS1，2	187	283	136	271	296	290	0	63
Ginkgoaceae	Ginkgo biloba	银杏	N	Trees	GTS2	0	0	0	0	0	0	0	10
Juglandaceae	Pterocarya stenoptera	枫杨	N	Trees	XLS1	55	0	0	0	0	0	0	0
Lamiaceae	Lamium amplexicaule	宝盖草	I	Annual or biennial	XLS1、MJS2	48	0	0	114	0	0	0	0
	Leonurus japonicus	益母草	N	Annual or biennial	XLS1，2	115	10	0	0	0	0	0	0
	Ocimum basilicum	罗勒	I	Annual or perennial	XLS1	2	0	0	0	0	0	0	0
	Perilla frutescens	紫苏	I	Annual	XLS2	0	8	0	0	0	0	0	0
	Salvia plebeia	荔枝草	N	Annual or biennial	XLS2	0	6	0	0	0	0	0	0
	Vitex negundo	牡荆	N	Trees	XLS2、MJS1	0	16	36	0	0	0	0	0
Lardizabalaceae	Akebia quinata	木通	N	Perennial woody vine	MJS1	0	0	7	0	0	0	0	0
Leguminosae	Glycine soja	野大豆	N	Annual	GTS2	0	0	0	0	0	0	0	6
	Kummerowia stipulacea	长萼鸡眼草	N	Annual	MJS1、GTS1	0	0	15	0	0	0	303	0
	Lespedeza bicolor	胡枝子	N	Shrubs	XLS1，2、MJS1、GTS1	11	2	20	0	0	0	15	0
	Medicago sativa	苜蓿	I	Perennial	XLS1，2、MJS1，2、GTS1，2、LWS1，2	82	91	1069	262	127	0	10	0
	Pueraria lobata	葛	I	Perennial	XLS1，2、GTS1	138	6	0	0	0	0	3	0
	Trifolium repens	白车轴草	I	Perennial	GTS1	0	0	0	0	0	0	11	0
	Vicia hirsuta	小巢菜	N	Annual	MJS1	0	0	267	0	0	0	0	0
	Vicia sativa	救荒野豌豆	N	Annual or biennial	XLS1，2、MJS1，2、GTS1、LWS1	320	487	120	120	276	455	11	55
	Vigna angularis	赤豆	I	Annual	GTS2	0	0	0	0	0	0	0	8
Lythraceae	Punica granatum	石榴	N	Shrubs or trees	MJS1	0	0	1	0	0	0	0	0
Malvaceae	Sida acuta	黄花棯	N	Perennial	MJS2	0	0	0	5	0	0	0	0
Mazaceae	Mazus japonicus	通泉草	N	Annual	XLS2、MJS1、GTS2	0	1	3	0	0	0	0	21
Meliaceae	Melia azedarach	楝	N	Trees	XLS2、MJS2	0	1	0	8	0	0	0	0
Moraceae	Broussonetia papyrifera	构树	N	Trees	XLS1，2、MJS1，2、GTS2、LWS2	9	9	1	4	0	9	0	26
	Maclura tricuspidata	柘	N	Shrubs or trees	XLS2	0	2	0	0	0	0	0	0
	Morus alba	桑	N	Shrubs or trees	XLS1，2	3	9	0	0	0	0	0	0
Oleaceae	Ligustrum lucidum	女贞	N	Shrubs or trees	MJS2	0	0	0	3	0	0	0	0
Onagraceae	Oenothera biennis	月见草	I	Biennial	GTS1	0	0	0	0	0	0	1	0
Oxalidaceae	Oxalis corniculata	酢浆草	I	Perennial	MJS1，2	0	0	77	54	0	0	0	0
Phytolaccaceae	Phytolacca acinosa	商陆	I	Perennial	MJS2	0	0	0	48	0	0	0	0
	Phytolacca americana	垂序商陆	I	Perennial	MJS2	0	0	0	17	0	0	0	0
Plantaginaceae	Plantago depressa	车前草	I	Annual or biennial	XLS2、GTS1	0	663	0	0	0	0	34	0
	Veronica arvensis	直立婆婆纳	I	Annual or biennial	MJS1，2	0	0	33	221	0	0	0	0
	Veronica persica	阿拉伯婆婆纳	I	Annual or biennial	XLS1，2、MJS1，2、GTS2、LWS2	202	114	62	106	0	152	0	59
Poaceae	Alopecurus aequalis	看麦娘	I	Annual	XLS2、MJS1、GTS2	0	73	300	0	0	0	0	172
	Arthraxon hispidus	荩草	N	Annual	GTS1	0	0	0	0	0	0	4	0
	Bothriochloa ischaemum	白羊草	N	Perennial	MJS1	0	0	934	0	0	0	0	0
	Bromus japonicus	雀麦	I	Annual	XLS1，2、MJS1，2、GTS1、LWS1，2	108	69	205	20	64	90	39	0
	Cynodon dactylon	狗牙根	N	Perennial	GTS1	0	0	0	0	0	0	160	0
	Digitaria sanguinalis	马唐	I	Annual	XLS1，2、MJS1、GTS1	30	62	875	0	0	0	333	0
	Echinochloa colonum	光头稗	I	Annual	GTS1	0	0	0	0	0	0	6	0
	Echinochloa crusgalli	稗	I	Annual	GTS2	0	0	0	0	0	0	0	3
	Eleusine indica	牛筋草	N	Annual	MJS2、GTS2	0	0	0	127	0	0	0	212
	Elymus dahuricus	披碱草	I	Perennial	XLS1、MJS1,2	103	285	4	32	0	0	0	0
	Eragrostis ferruginea	知风草	N	Perennial	GTS2	0	0	0	0	0	0	0	41
	Imperata cylindrica	白茅	I	Perennial	GTS1	0	0	0	0	0	0	250	0
	Leptochloa chinensis	千金子	N	Annual	MJS1、GTS1，2	0	0	445	0	0	0	3	30
	Miscanthus floridulus	五节芒	I	Perennial	MJS1	0	0	3	0	0	0	0	0
	Pennisetum alopecuroides	狼尾草	I	Perennial	XLS2、MJS1，2、GTS1，2	0	2	3	46	0	0	2	12
	Phragmites australis	芦苇	I	Perennial	GTS1、LWS2	0	0	0	0	0	73	23	0
	Phyllostachys propinqua	早园竹	N	Arbor or shrubby bamboo	XLS2	0	54	0	0	0	0	0	0
	Poa annua	早熟禾	N	Annual	MJS2	0	0	0	23	0	0	0	0
	Setaria faberii	大狗尾草	I	Annual	XLS1、MJS1，2、GTS1	116	0	10	27	0	0	7	0
	Setaria viridis	狗尾草	I	Annual	XLS1，2、MJS1，2、GTS1，2	308	65	1250	5	0	0	561	120
	Themeda japonica	黄背草	I	Perennial	XLS1	4	0	0	0	0	0	0	0
Polygonaceae	Fallopia multiflora	何首乌	I	Perennial vine	MJS1	0	0	83	0	0	0	0	0
	Polygonum	蓼	N	Annual or perennial	XLS1、MJS2、GTS2	13	0	0	6	0	0	0	30
	Polygonum aviculare	萹蓄	I	Annual	GTS2	0	0	0	0	0	0	0	20
	Polygonum darrisii	大箭叶蓼	I	Annual	XLS1	3	0	0	0	0	0	0	0
Primulaceae	Lysimachia candida	泽珍珠菜	I	Annual or biennial	GTS2	0	0	0	0	0	0	0	192
	Lysimachia christiniae	过路黄	N	Perennial	XLS1	66	0	0	0	0	0	0	0
Psilotaceae	Psilotum nudum	松叶蕨	N	Perennial	GTS2	0	0	0	0	0	0	0	100
Ranunculaceae	Ranunculus japonicus	毛茛	I	Perennial	GTS2	0	0	0	0	0	0	0	141
	Ranunculus muricatus	刺果毛茛	I	Annual	MJS2	0	0	0	5	0	0	0	0
	Semiaquilegia adoxoides	天葵	N	Perennial	XLS1	205	0	0	0	0	0	0	0
Rosaceae	Duchesnea indica	蛇莓	N	Perennial	XLS1	50	0	0	0	0	0	0	0
	Rosa banksiae	木香花	N	Shrubs	GTS1	0	0	0	0	0	0	3	0
	Rosa multiflora	野蔷薇	N	Shrubs	XLS1，2	3	127	0	0	0	0	0	0
	Rosa sp.	蔷薇	N	Shrubs	GTS2	0	0	0	0	0	0	0	12
	Rubus hirsutus	蓬蘽	N	Shrubs	XLS1，2、MJS2	510	77	0	569	0	0	0	0
	Rubus parvifolius	茅莓	N	Shrubs	XLS2	0	15	0	0	0	0	0	0
Rubiaceae	Galium spurium	猪殃殃	I	Perennial	XLS1，2、MJS2、GTS2、LWS1，2	328	129	0	342	207	521	0	10
	Paederia cruddasiana	臭鸡矢藤	I	Shrubs	XLS2、MJS2、GTS1	0	17	0	78	0	0	1	0
Salicaceae	Populus tomentosa	毛白杨	N	Trees	XLS1	13	0	0	0	0	0	0	0
Santalaceae	Thesium chinense	百蕊草	N	Perennial	MJS1，2	0	0	3	37	0	0	0	0
Sapindaceae	Acer henryi	建始槭	N	Trees	MJS1	0	0	3	0	0	0	0	0
	Acer triflorum	三花槭	I	Trees	MJS1	0	0	4	0	0	0	0	0
	Cardiospermum halicacabum	倒地铃	N	Perennial woody vine	MJS2	0	0	0	16	0	0	0	0
Solanaceae	Solanum nigrum	龙葵	I	Annual	XLS1	2	0	0	0	0	0	0	0
	Solanum pseudocapsicum	珊瑚樱	I	Shrubs	MJS2	0	0	0	138	0	0	0	0
Theaceae	Camellia japonica	山茶	N	Shrubs or trees	GTS2	0	0	0	0	0	0	0	16
Tiliaceae	Corchoropsis tomentosa	田麻	N	Annual	XLS1	4	0	0	0	0	0	0	0
Ulmaceae	Zelkova serrata	榉树	N	Trees	MJS2	0	0	0	7	0	0	0	0
Umbelliferae	Coriandrum sativum	芫荽	I	Annual or biennial	MJS1、LWS2	0	0	4	0	0	9	0	0
	Daucus carota	野胡萝卜	I	Biennial	MJS1、GTS1	0	0	34	0	0	0	106	0
	Torilis scabra	窃衣	N	Annual or perennial	XLS1，2、MJS1，2、GTS2	71	514	57	97	0	0	0	3
Vitaceae	Cayratia japonica	乌蔹莓	I	Perennial herbaceous vine	MJS1、GTS2	0	0	95	0	0	0	0	6
	Vitis bryoniifolia	蘡薁	N	Perennial woody vine	XLS2、MJS1	0	46	1	0	0	0	0	0
